# Supplementary material for: Solvents influence on sizes of channels in three fry topological Mn(ii)-MOFs based on metal–carboxylate chains: syntheses, structures and magnetic properties
Source: Royal Society of Chemistry journal article supplement (doi:10.1039/c3ce41120f), 2013-01-01
Supplement: c3ce41120f.pdf [file c3ce41120f.pdf]

# Supporting Information

## **Solvents influence on sizes of channels in three fry topological Mn(II)-MOFs based on metal-carboxylate chains: Syntheses, structures and magnetic properties†**

Xiang Zhou, Ping Liu, Wen-Huan Huang, Meng Kang, Yao-Yu Wang,\* and Qi-Zhen  
Shi

*Key Laboratory of Synthetic and Natural Functional Molecule Chemistry of the Ministry of Education, Shaanxi;*

*Key Laboratory of Physico-Inorganic Chemistry, College of Chemistry & Materials Science, Northwest*

*University, Xi'an 710069, P. R. China. E-mail: [wyaoyu@nwu.edu.cn](mailto:wyaoyu@nwu.edu.cn)*

## The Supporting Pictures For Article

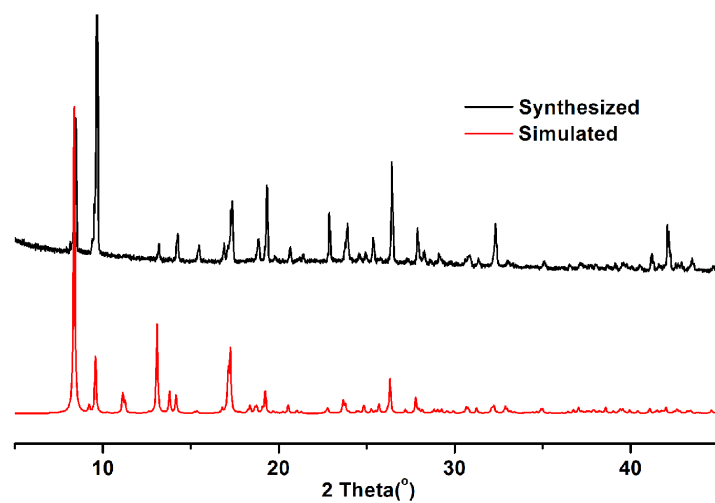

Fig. S1 Powder X-ray diffraction patterns of compound 1.

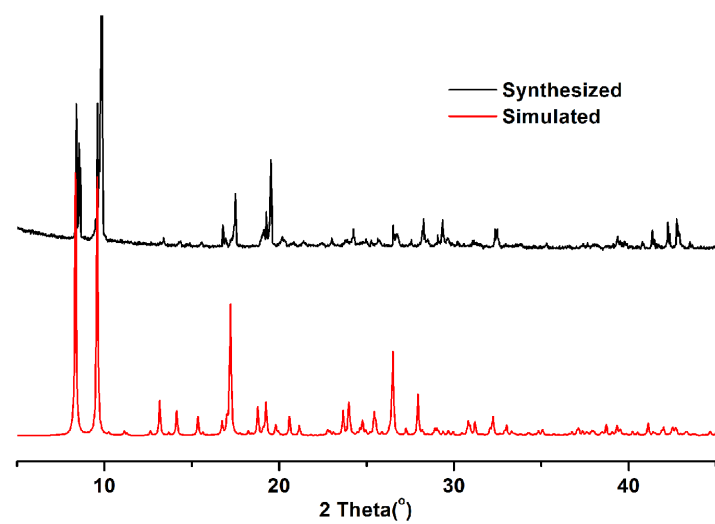

Fig. S2 Powder X-ray diffraction patterns of compound 2.

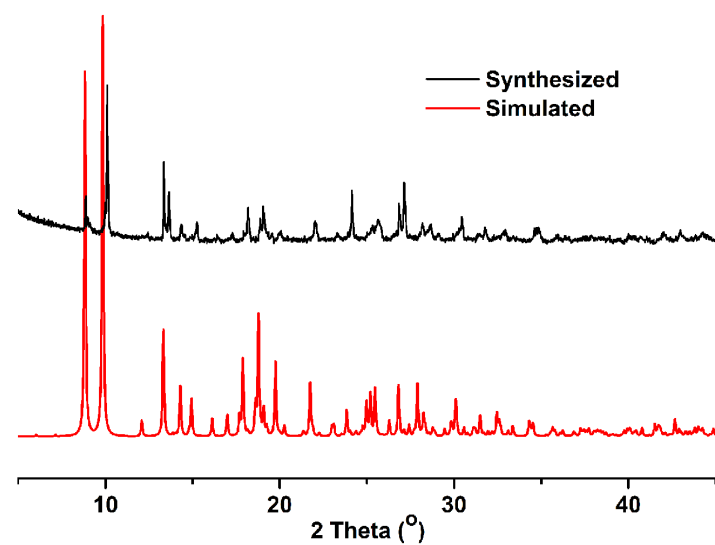

Fig. S3 Powder X-ray diffraction patterns of compound 3.

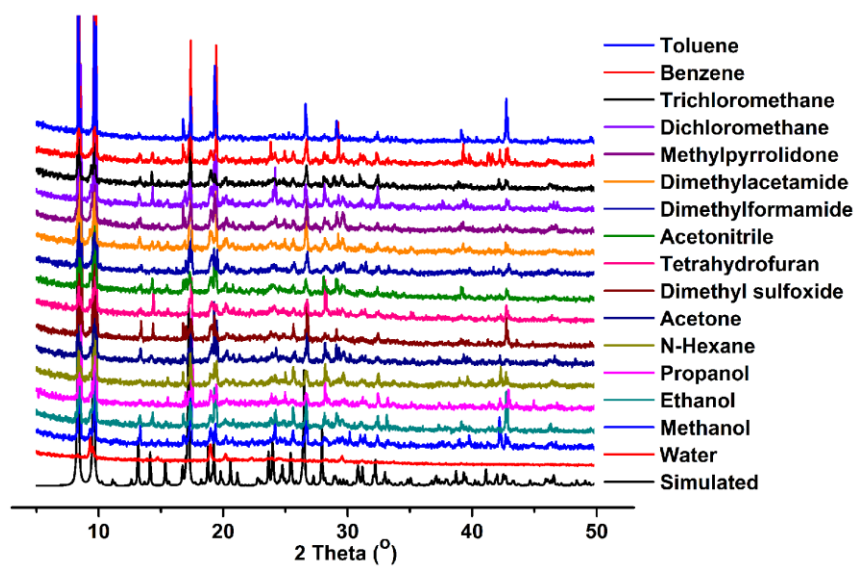

Fig. S4 The PXR D patterns of 2 after soaking in various solvents for 1 week.

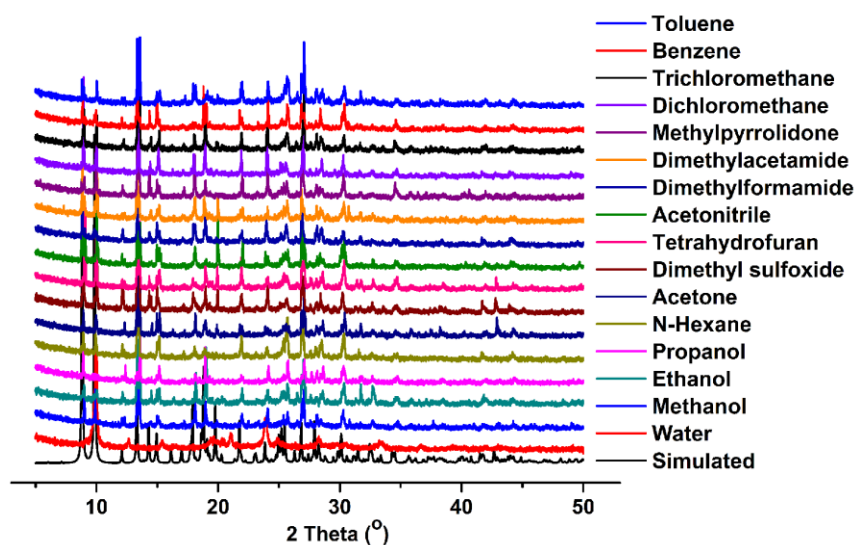

Fig. S5 The PXR D patterns of 3 after soaking in various solvents for 1 week.

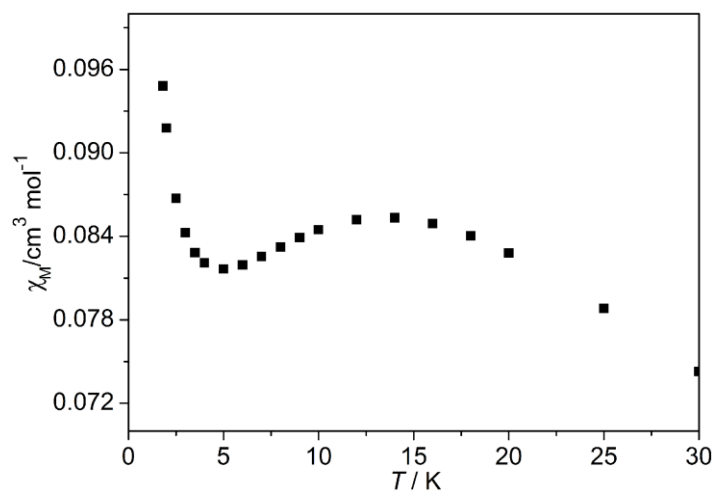

Fig. S6 The  $\chi_M$  VS. T plot for compound 1.

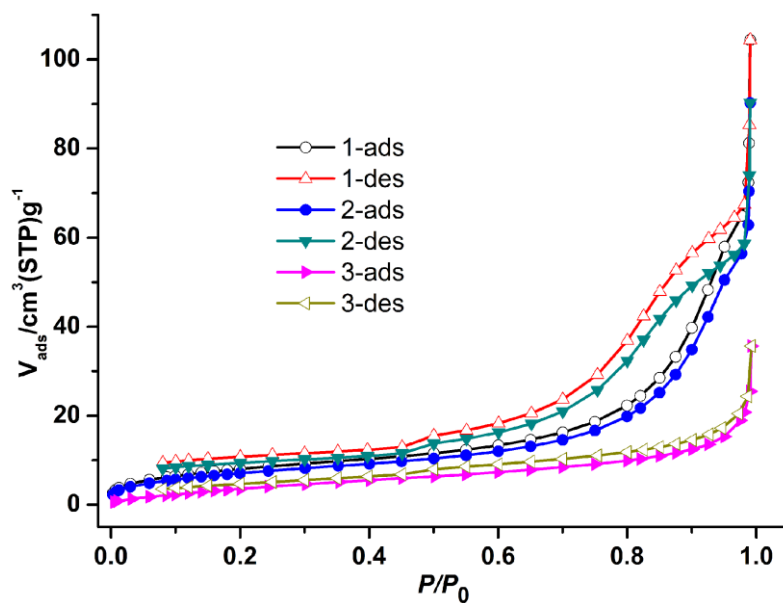

Fig. S7 Nitrogen adsorption–desorption isotherms of 1–3 at 77 K.

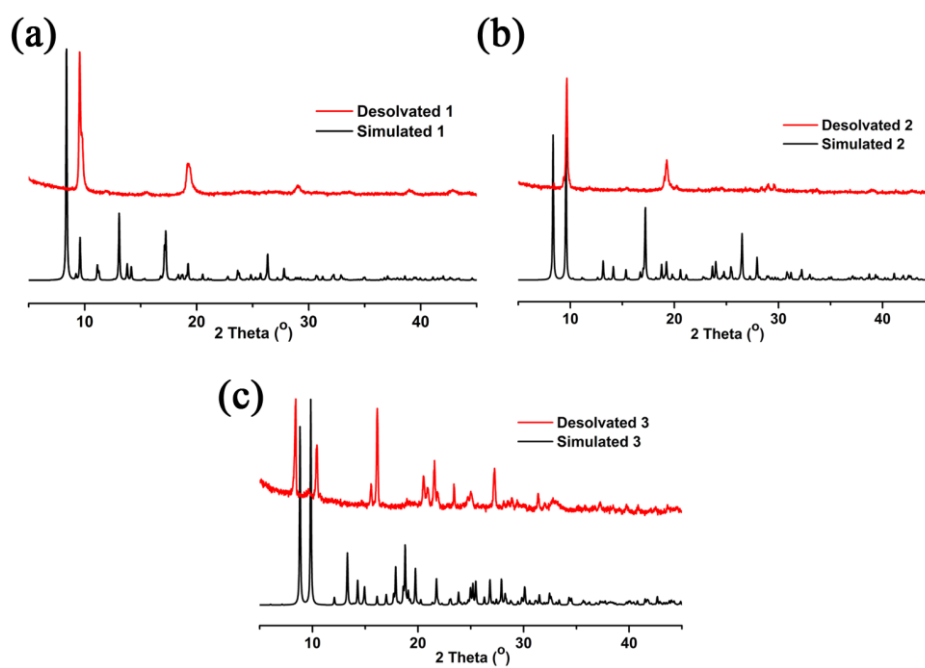

Fig. S8 PXRD patterns of 1 (a), 2 (b), 3 (c), desolvated 1, 2 and 3.

## The Supporting Scheme For Article

### Scheme S1. Coordination Modes of Ligands in Compounds 1 and 3

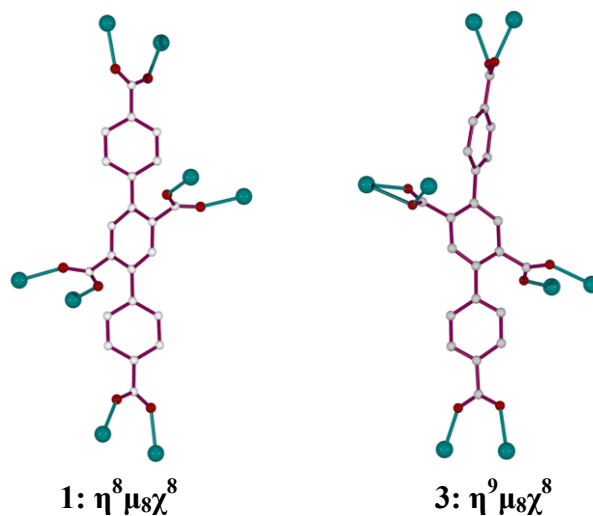

Two coordination fashions of ligands  $H_4tpc$  in compounds **1** and **3**. The symbol of  $\eta^x \mu_y \chi^z$  describes the coordination modes, where:  $\eta^x$  – number of coordination bonds donated from the ligand;  $\mu_y$  – number of metal centers bonded to the ligand;  $\chi^z$  – number of atoms donating coordination bonds.

## The Supporting Table For Article

**Table S1.** Comparison of the diverse solvent-controlled Mn-tpc system

| Compound                             | 1                                                                 | 2                                                                 | 3                                                                                           |
|--------------------------------------|-------------------------------------------------------------------|-------------------------------------------------------------------|---------------------------------------------------------------------------------------------|
| Crystallizing medium                 | H <sub>2</sub> O/NMP                                              | H <sub>2</sub> O/DMA                                              | H <sub>2</sub> O/DMF                                                                        |
| Coordinated solvents                 | H <sub>2</sub> O/NMP                                              | H <sub>2</sub> O/DMA                                              | DMF                                                                                         |
| Coordination modes of solvent        | bridging                                                          | bridging                                                          | monodentate/bridging                                                                        |
| Bridging fashions of carboxyl groups | $\mu_2\text{-}\eta^1\text{:}\eta^1$                               | $\mu_2\text{-}\eta^1\text{:}\eta^1$                               | $\mu_2\text{-}\eta^1\text{:}\eta^1/\mu_2\text{-}\eta^1\text{:}\eta^2$                       |
| Metal coordination                   | octahedron (MnO <sub>6</sub> )                                    | octahedron (MnO <sub>6</sub> )                                    | octahedron (MnO <sub>6</sub> )                                                              |
| Intermetallic bridging modes         | ( $\mu\text{-H}_2\text{O/NMP}$ )( $\mu\text{-COO}$ ) <sub>2</sub> | ( $\mu\text{-H}_2\text{O/DMA}$ )( $\mu\text{-COO}$ ) <sub>2</sub> | ( $\mu\text{-DMF}$ )( $\mu\text{-COO}$ ) <sub>2</sub><br>/( $\mu\text{-COO}$ ) <sub>2</sub> |
| Interchain Mn...Mn distances         | 9.494 Å, 12.628 Å                                                 | 9.490 Å, 12.646 Å                                                 | 8.880 Å, 12.463 Å                                                                           |
| Size of channel                      | 9.494 × 3.725 Å <sup>2</sup>                                      | 9.490 × 3.706 Å <sup>2</sup>                                      | 8.880 × 3.729 Å <sup>2</sup>                                                                |
| Pore volume                          | 1242.4 Å <sup>3</sup>                                             | 1205.9 Å <sup>3</sup>                                             | 1005.3 Å <sup>3</sup>                                                                       |
| Void ratio                           | 41.4%                                                             | 40.5%                                                             | 37.0%                                                                                       |

**Table S2.** Selected Bond Lengths (Å) and Angles (°) for **1-3**.

| Complex 1           |            |                      |            |              |          |
|---------------------|------------|----------------------|------------|--------------|----------|
| Mn(1)-O(2)          | 2.114(3)   | Mn(1)-O(8)#1         | 2.132(4)   | Mn(1)-O(6)#2 | 2.136(3) |
| Mn(1)-O(4) #3       | 2.155(3)   | Mn(1)-O(9)           | 2.240(3)   | Mn(1)-O(10)  | 2.383(3) |
| Mn(2)-O(7) #3       | 2.155(3)   | Mn(2)-O(5)#6         | 2.159(3)   | Mn(2)-O(9)#6 | 2.261(3) |
| Mn(3)-O(3) #3       | 2.133(3)   | Mn(3)-O(1)           | 2.149(3)   | Mn(3)-O(10)  | 2.253(3) |
| O(2)-Mn(1)-O(8)#1   | 162.87(14) | O(4)#3-Mn(1)-O(10)   | 99.89(12)  |              |          |
| O(2)-Mn(1)-O(6)#2   | 91.49(14)  | O(9)-Mn(1)-O(10)     | 169.79(11) |              |          |
| O(8)#1-Mn(1)-O(6)#2 | 96.44(14)  | O(7)#3-Mn(2)-O(7)#4  | 180.00(15) |              |          |
| O(2)-Mn(1)-O(4)#3   | 87.59(14)  | O(7)#3-Mn(2)-O(5)#5  | 91.85(13)  |              |          |
| O(8)#1-Mn(1)-O(4)#3 | 85.75(14)  | O(7)#4-Mn(2)-O(5)#5  | 88.15(13)  |              |          |
| O(6)#2-Mn(1)-O(4)#3 | 175.04(13) | O(7)#3-Mn(2)-O(5)    | 88.15(13)  |              |          |
| O(2)-Mn(1)-O(9)     | 94.10(12)  | O(7)#4-Mn(2)-O(5)    | 91.85(13)  |              |          |
| O(8)#1-Mn(1)-O(9)   | 101.67(13) | O(5)#5-Mn(2)-O(5)    | 180.0      |              |          |
| O(6)#2-Mn(1)-O(9)   | 85.14(13)  | O(7)#3-Mn(2)-O(9)#6  | 87.63(12)  |              |          |
| O(4)#3-Mn(1)-O(9)   | 90.07(13)  | O(7)#4-Mn(2)-O(9)#6  | 92.37(12)  |              |          |
| O(2)-Mn(1)-O(10)    | 88.60(12)  | O(5)#5-Mn(2)-O(9)#6  | 90.07(12)  |              |          |
| O(8)#1-Mn(1)-O(10)  | 77.05(13)  | O(5)-Mn(2)-O(9)#6    | 89.93(12)  |              |          |
| O(6)#2-Mn(1)-O(10)  | 84.95(12)  | O(7)#3-Mn(2)-O(9)#7  | 92.37(12)  |              |          |
| O(7)#4-Mn(2)-O(9)#7 | 87.63(12)  | O(1)#9-Mn(3)-O(1)    | 180.000(1) |              |          |
| O(5)#5-Mn(2)-O(9)#7 | 89.93(12)  | O(3)#3-Mn(3)-O(10)   | 86.98(13)  |              |          |
| O(5)-Mn(2)-O(9)#7   | 90.07(12)  | O(3)#8-Mn(3)-O(10)   | 93.02(13)  |              |          |
| O(9)#6-Mn(2)-O(9)#7 | 180.000(1) | O(1)#9-Mn(3)-O(10)   | 86.58(12)  |              |          |
| O(3)#3-Mn(3)-O(3)#8 | 180.000(1) | O(1)-Mn(3)-O(10)     | 93.42(12)  |              |          |
| O(3)#3-Mn(3)-O(1)#9 | 84.39(14)  | O(3)#3-Mn(3)-O(10)#9 | 93.02(13)  |              |          |
| O(3)#8-Mn(3)-O(1)#9 | 95.61(13)  | O(3)#8-Mn(3)-O(10)#9 | 86.98(13)  |              |          |
| O(3)#3-Mn(3)-O(1)   | 95.61(13)  | O(1)#9-Mn(3)-O(10)#9 | 93.42(12)  |              |          |
| O(3)#8-Mn(3)-O(1)   | 84.39(14)  | O(1)-Mn(3)-O(10)#9   | 86.58(12)  |              |          |
| O(10)-Mn(3)-O(10)#9 | 180.000(1) | Mn(1)-O(9)-Mn(2)#12  | 111.70(13) |              |          |
| Mn(3)-O(10)-Mn(1)   | 109.22(12) |                      |            |              |          |

Symmetry transformations used to generate equivalent atoms: #1  $x-1, -y+3/2, z+1/2$ ; #2  $x, -y+3/2, z+1/2$ ; #3  $x-1, y, z$ ; #4  $-x+1, -y+1, -z+1$ ; #5  $-x, -y+1, -z+1$ ; #6  $-x, y-1/2, -z+3/2$ ; #7  $x, -y+3/2, z-1/2$ ; #8  $-x+1, -y+1, -z+2$ ; #9  $-x, -y+1, -z+2$ ; #12  $-x, y+1/2, -z+3/2$

| Complex 2           |            |                     |           |              |          |
|---------------------|------------|---------------------|-----------|--------------|----------|
| Mn(1)-O(8)#1        | 2.114(4)   | Mn(1)-O(5)          | 2.135(3)  | Mn(1)-O(3)#2 | 2.141(4) |
| Mn(1)-O(1)#3        | 2.149(4)   | Mn(1)-O(9)          | 2.246(3)  | Mn(1)-O(10)  | 2.373(3) |
| Mn(2)-O(6)          | 2.155(3)   | Mn(2)-O(2)#3        | 2.165(4)  | Mn(2)-O(9)   | 2.276(3) |
| Mn(3)-O(4)#2        | 2.118(4)   | Mn(3)-O(7)#1        | 2.175(4)  | Mn(3)-O(10)  | 2.236(3) |
| O(8)#1-Mn(1)-O(5)   | 91.58(16)  | O(2)#5-Mn(2)-O(9)#4 | 93.96(14) |              |          |
| O(8)#1-Mn(1)-O(3)#2 | 87.90(17)  | O(2)#3-Mn(2)-O(9)#4 | 86.04(14) |              |          |
| O(5)-Mn(1)-O(3)#2   | 175.00(15) | O(6)#4-Mn(2)-O(9)   | 91.10(14) |              |          |
| O(8)#1-Mn(1)-O(1)#3 | 162.04(16) | O(6)-Mn(2)-O(9)     | 88.90(14) |              |          |

|                     |            |                      |            |
|---------------------|------------|----------------------|------------|
| O(5)-Mn(1)-O(1)#3   | 96.26(16)  | O(2)#5-Mn(2)-O(9)    | 86.04(14)  |
| O(3)#2-Mn(1)-O(1)#3 | 85.65(17)  | O(2)#3-Mn(2)-O(9)    | 93.96(14)  |
| O(8)#1-Mn(1)-O(9)   | 93.14(15)  | O(9)#4-Mn(2)-O(9)    | 180.000(1) |
| O(5)-Mn(1)-O(9)     | 84.77(14)  | O(4)#2-Mn(3)-O(4)#6  | 180.000(1) |
| O(3)#2-Mn(1)-O(9)   | 90.29(15)  | O(4)#2-Mn(3)-O(7)#1  | 95.99(16)  |
| O(1)#3-Mn(1)-O(9)   | 103.62(15) | O(4)#6-Mn(3)-O(7)#1  | 84.01(17)  |
| O(8)#1-Mn(1)-O(10)  | 89.44(15)  | O(4)#2-Mn(3)-O(7)#7  | 84.01(17)  |
| O(5)-Mn(1)-O(10)    | 84.45(14)  | O(4)#6-Mn(3)-O(7)#7  | 95.99(16)  |
| O(3)#2-Mn(1)-O(10)  | 100.51(14) | O(7)#1-Mn(3)-O(7)#7  | 180.000(2) |
| O(1)#3-Mn(1)-O(10)  | 75.33(15)  | O(4)#2-Mn(3)-O(10)#8 | 92.28(15)  |
| O(9)-Mn(1)-O(10)    | 168.98(13) | O(4)#6-Mn(3)-O(10)#8 | 87.72(15)  |
| O(6)#4-Mn(2)-O(6)   | 180.000(1) | O(7)#1-Mn(3)-O(10)#8 | 86.07(14)  |
| O(6)#4-Mn(2)-O(2)#5 | 88.58(16)  | O(7)#7-Mn(3)-O(10)#8 | 93.93(14)  |
| O(6)-Mn(2)-O(2)#5   | 91.42(16)  | O(4)#2-Mn(3)-O(10)   | 87.72(15)  |
| O(6)#4-Mn(2)-O(2)#3 | 91.42(16)  | O(4)#6-Mn(3)-O(10)   | 92.28(15)  |
| O(6)-Mn(2)-O(2)#3   | 88.58(16)  | O(7)#1-Mn(3)-O(10)   | 93.93(14)  |
| O(2)#5-Mn(2)-O(2)#3 | 180.000(2) | O(7)#7-Mn(3)-O(10)   | 86.07(14)  |
| O(6)#4-Mn(2)-O(9)#4 | 88.90(14)  | O(10)#8-Mn(3)-O(10)  | 180.000(1) |
| O(6)-Mn(2)-O(9)#4   | 91.10(14)  | Mn(1)-O(9)-Mn(2)     | 110.05(15) |
| Mn(3)-O(10)-Mn(1)   | 108.61(15) |                      |            |

Symmetry transformations used to generate equivalent atoms: #1  $x, -y+3/2, z+1/2$ ; #2  $x+1, -y+3/2, +1/2$ ; #3  $x+1, y, z$ ; #4  $-x+2, -y+2, -z+2$ ; #5  $-x+1, -y+2, -z+2$ ; #6  $-x+1, y-1/2, -z+3/2$ ; #7  $-x+2, y-1/2, -z+3/2$ ; #8  $-x+2, -y+1, -z+2$

| Complex 3           |            |                     |            |              |          |
|---------------------|------------|---------------------|------------|--------------|----------|
| Mn(1)-O(1)#1        | 2.071(2)   | Mn(1)-O(3)          | 2.195(2)   | Mn(1)-O(9)   | 2.327(3) |
| Mn(2)-O(4)          | 2.105(2)   | Mn(2)-O(2)#2        | 2.146(2)   | Mn(2)-O(9)#3 | 2.396(3) |
| Mn(3)-O(8)#7        | 2.099(3)   | Mn(3)-O(5)#8        | 2.166(2)   | Mn(3)-O(7)#9 | 2.178(2) |
| Mn(3)-O(10)         | 2.180(3)   | Mn(3)-O(6)          | 2.214(3)   | Mn(3)-O(5)   | 2.408(2) |
| O(1)#1-Mn(1)-O(1)#2 | 180.000(1) | O(1)#1-Mn(1)-O(3)   | 84.33(10)  |              |          |
| O(1)#2-Mn(1)-O(3)   | 95.67(10)  | O(3)#3-Mn(1)-O(3)   | 180.0      |              |          |
| O(1)#1-Mn(1)-O(9)   | 92.69(10)  | O(1)#2-Mn(1)-O(9)   | 87.31(10)  |              |          |
| O(3)#3-Mn(1)-O(9)   | 89.82(10)  | O(3)-Mn(1)-O(9)     | 90.18(9)   |              |          |
| O(9)#3-Mn(1)-O(9)   | 180.0      | O(4)-Mn(2)-O(4)#4   | 180.000(1) |              |          |
| O(4)-Mn(2)-O(2)#5   | 87.28(10)  | O(4)#4-Mn(2)-O(2)#5 | 92.72(10)  |              |          |
| O(2)#5-Mn(2)-O(2)#2 | 180.0      | O(4)-Mn(2)-O(9)#3   | 87.26(10)  |              |          |
| O(4)#4-Mn(2)-O(9)#3 | 92.74(10)  | O(2)#5-Mn(2)-O(9)#3 | 82.78(9)   |              |          |
| O(2)#2-Mn(2)-O(9)#3 | 97.22(9)   | O(9)#3-Mn(2)-O(9)#6 | 180.00(11) |              |          |
| O(8)#7-Mn(3)-O(5)#8 | 98.36(10)  | O(8)#7-Mn(3)-O(7)#9 | 170.07(10) |              |          |
| O(5)#8-Mn(3)-O(7)#9 | 91.54(10)  | O(8)#7-Mn(3)-O(10)  | 86.47(12)  |              |          |
| O(5)#8-Mn(3)-O(10)  | 96.58(11)  | O(7)#9-Mn(3)-O(10)  | 93.17(11)  |              |          |
| O(8)#7-Mn(3)-O(6)   | 91.70(11)  | O(5)#8-Mn(3)-O(6)   | 94.67(9)   |              |          |
| O(7)#9-Mn(3)-O(6)   | 86.71(10)  | O(10)-Mn(3)-O(6)    | 168.75(11) |              |          |
| O(8)#7-Mn(3)-O(5)   | 87.30(9)   | O(5)#8-Mn(3)-O(5)   | 151.07(6)  |              |          |
| O(7)#9-Mn(3)-O(5)   | 83.64(9)   | O(10)-Mn(3)-O(5)    | 112.12(10) |              |          |

---

|                     |            |                     |            |
|---------------------|------------|---------------------|------------|
| O(6)-Mn(3)-O(5)     | 56.67(9)   | Mn(3)#10-O(5)-Mn(3) | 116.74(10) |
| Mn(1)-O(9)-Mn(2)#12 | 104.28(10) |                     |            |

---

Symmetry transformations used to generate equivalent atoms: #1  $-x+1, -y+1, -z+1$ ; #2  $x-1, y, z$ ; #3  $-x, -y+1, -z+1$ ; #4  $-x, -y+2, -z+1$ ; #5  $-x+1, -y+2, -z+1$ ; #6  $x, y+1, z$ ; #7  $x+1, y, z$ ; #8  $-x+1, y-1/2, -z+1/2$ ; #9  $-x, y-1/2, -z+1/2$ ; #10  $-x+1, y+1/2, -z+1/2$ ; #12  $x, y-1, z$
